# Supplementary material
Source: PubMed Central journal article supplement (PMC4613958)
Supplement: supp_115.227348_227348Supplemental_figures_and_tables.pdf [file supp_115.227348_227348Supplemental_figures_and_tables.pdf]

**New pyripyropene A derivatives, highly SOAT2-selective inhibitors, improve  
hypercholesterolemia and atherosclerosis in atherogenic mouse models**

Taichi Ohshiro, Masaki Ohtawa, Tohru Nagamitsu, Daisuke Matsuda, Hiroaki Yagyū,

Matthew A. Davis, Lawrence L. Rudel, Shun Ishibashi, Hiroshi Tomoda

*From Graduate School of Pharmaceutical Sciences, Kitasato University, Japan (T.O.,*

*M.O., T.N., D.M., H.T.); Department of Medicine, Jichi Medical University, Japan*

*(T.O., H.Y., S.I.); Department of Internal Medicine, Section on Molecular Medicine,*

*Wake Forest School of Medicine, USA (T.O., M.D., L.R.).*

Journal of Pharmacology and Experimental Therapeutics

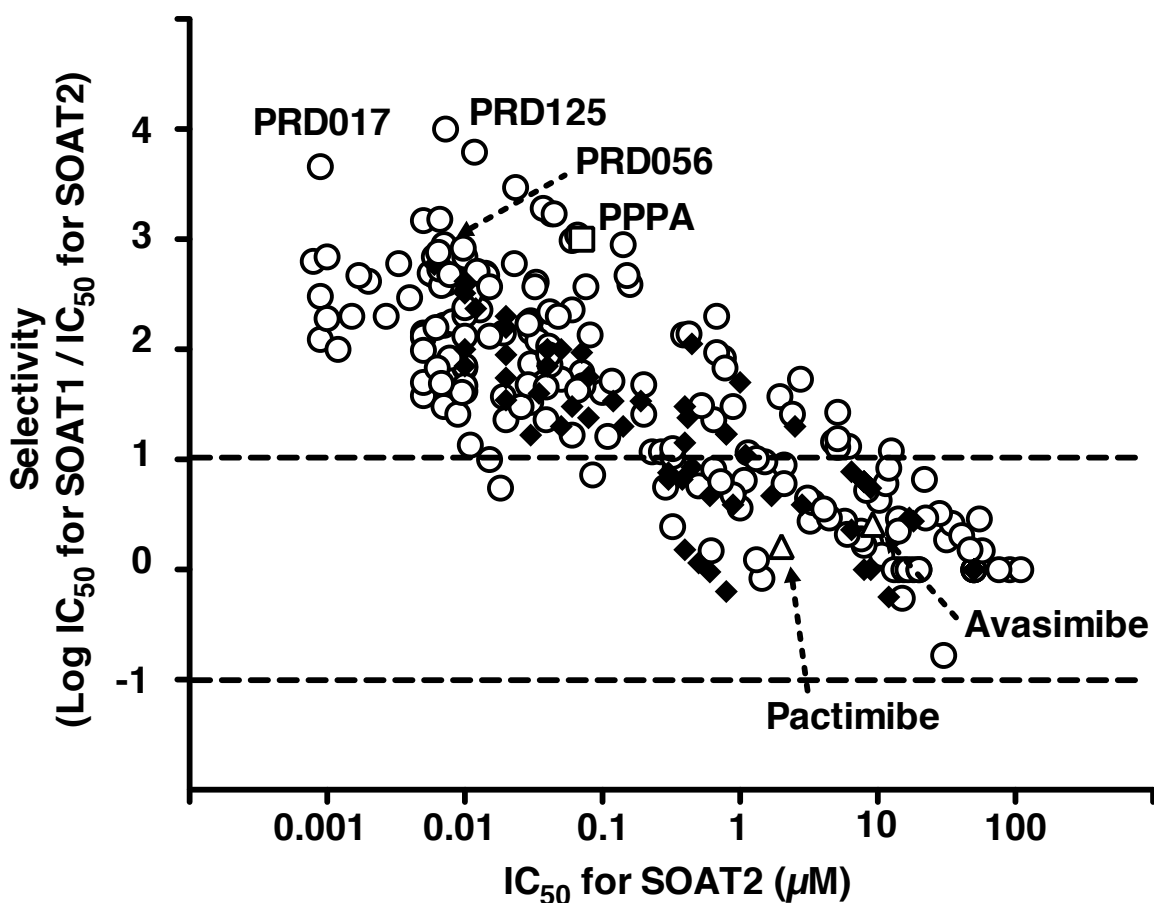

**Supplemental Figure 1 The selectivity of PPPA derivatives toward SOAT2.**

$IC_{50}$  values for SOAT2 ( $\mu M$ ) of PPPA derivatives and the selectivity index toward SOAT2 (SI values ( $\log IC_{50}$  for SOAT1/  $IC_{50}$  for SOAT2)) were plotted on X and Y axes, respectively; PPPA ( $\square$ ), the first ( $\blacklozenge$ ) and the second (O) generation PPPA derivatives, avasimibe ( $\triangle$ ) and pactimibe ( $\triangle$ ).

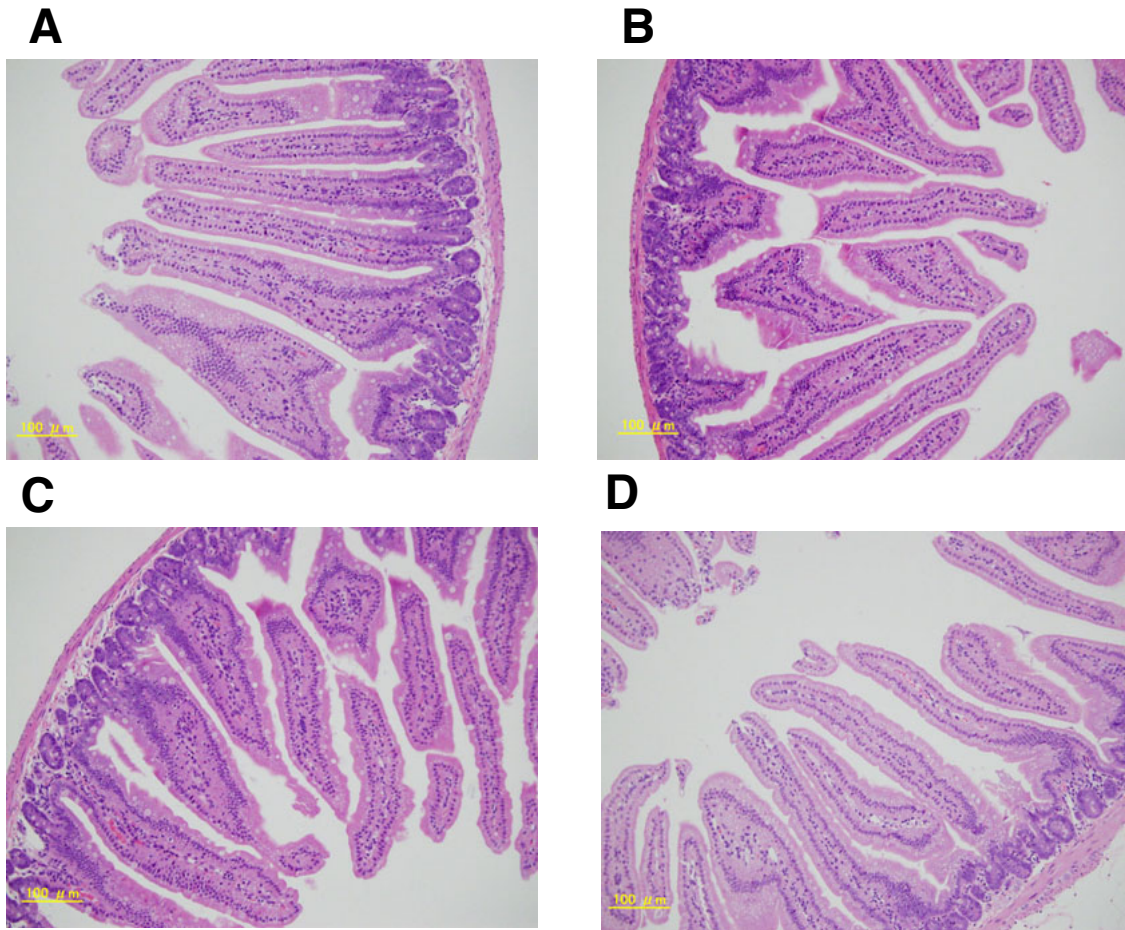

**Supplemental Figure 2 The histology of small intestine of PPPA derivative-treated *Apoe*<sup>-/-</sup> mice.**

After 12-week treatment, the cross-section of the small intestine (A~D) of *Apoe*<sup>-/-</sup> mice was performed with hematoxylin-eosin. (A) control; (B) PRD017 at 10 mg/kg/day; (C) PRD056 at 10 mg/kg/day; (D) PRD125 at 10 mg/kg/day.

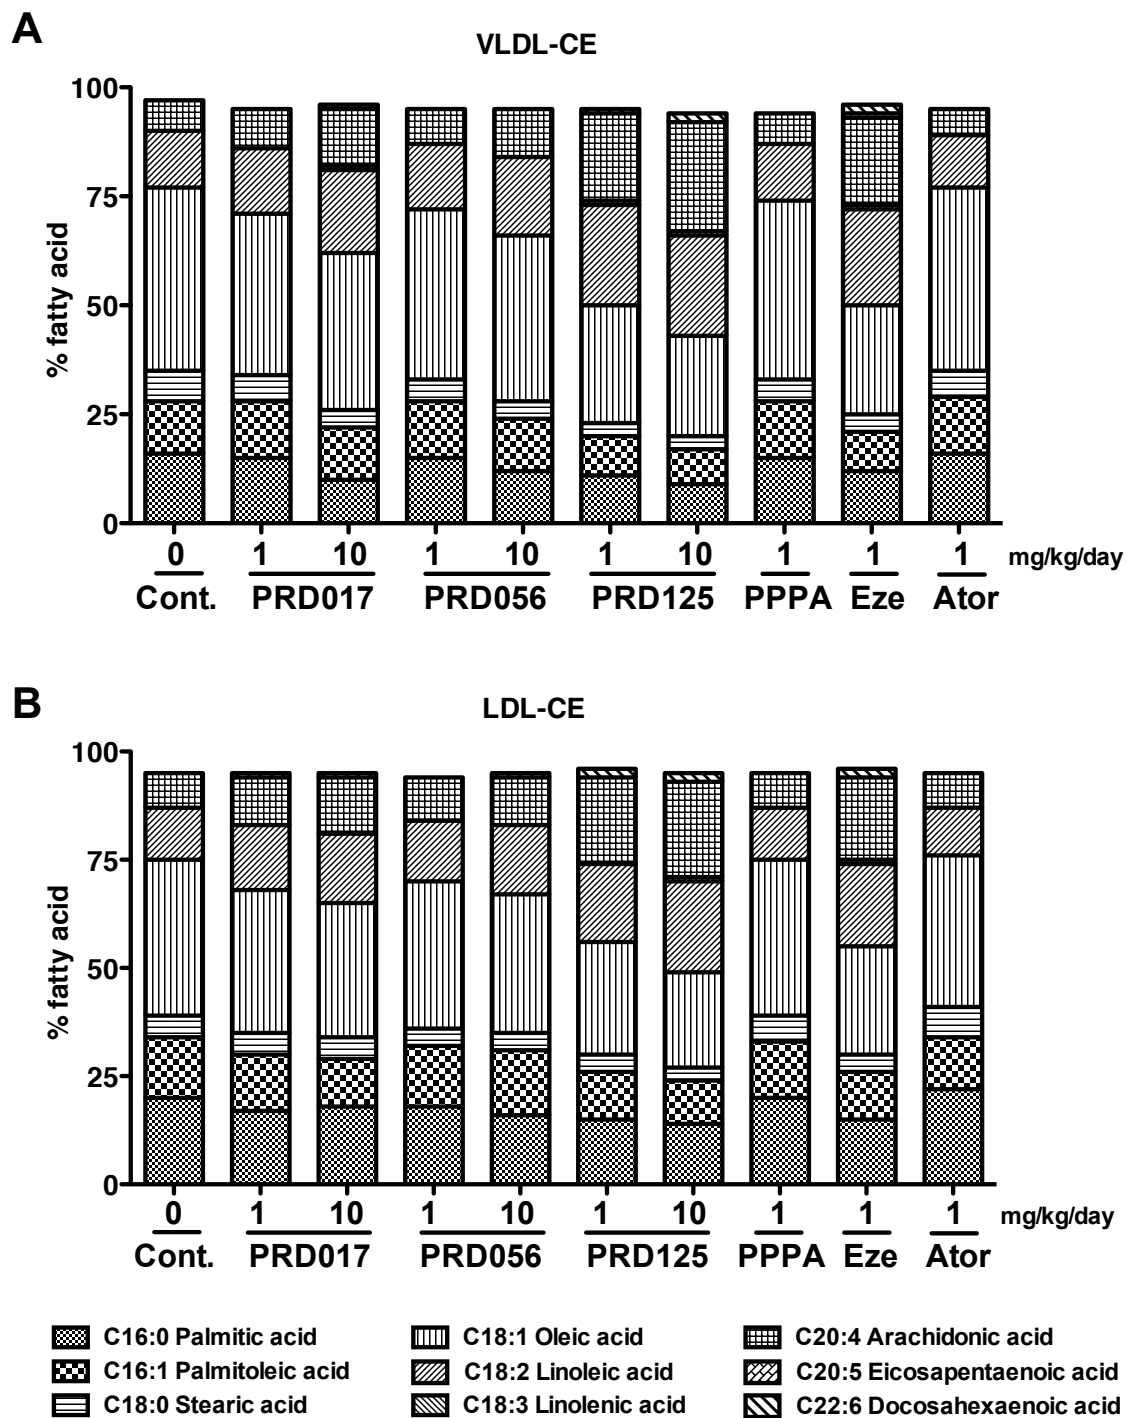

**Supplemental Figure 3 Fatty acids of cholesteryl ester in 12-week drug-treated *ApoE*<sup>-/-</sup> mice.**

After 12-week treatment, the cholesteryl ester fatty acid composition in VLDL (A) and LDL (B) of *ApoE*<sup>-/-</sup> mice was measured with mass-spec.

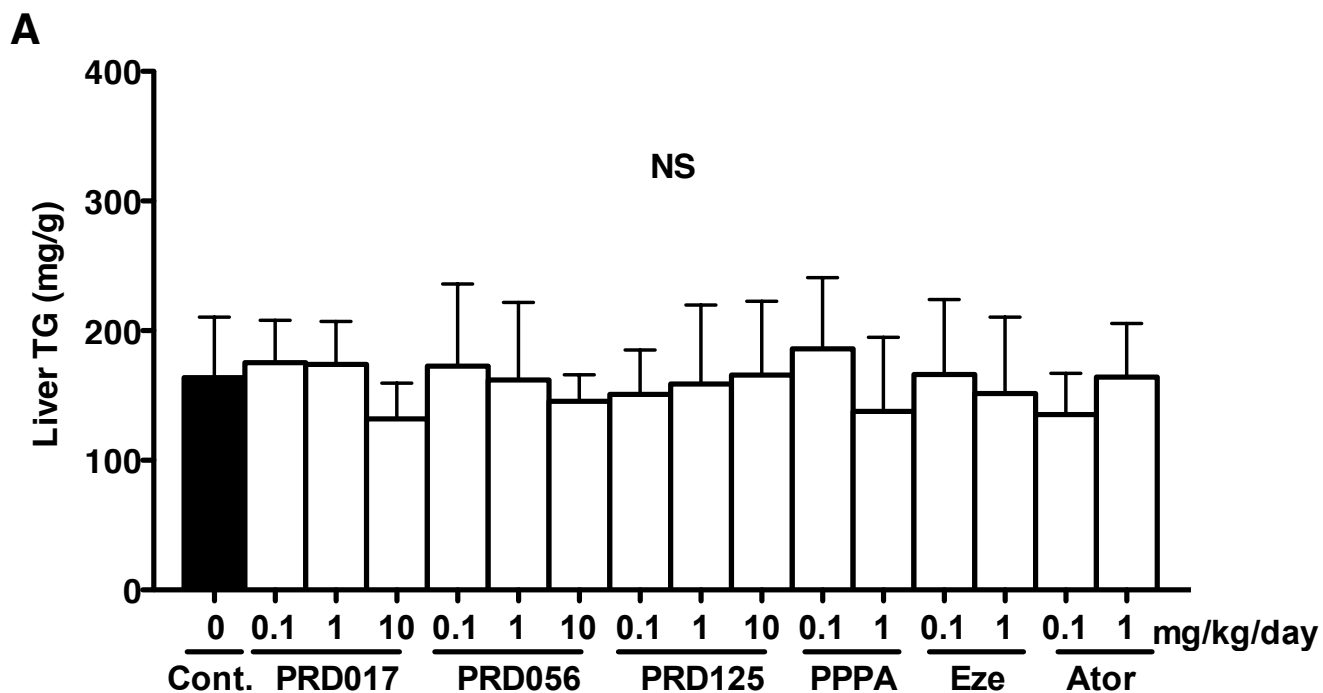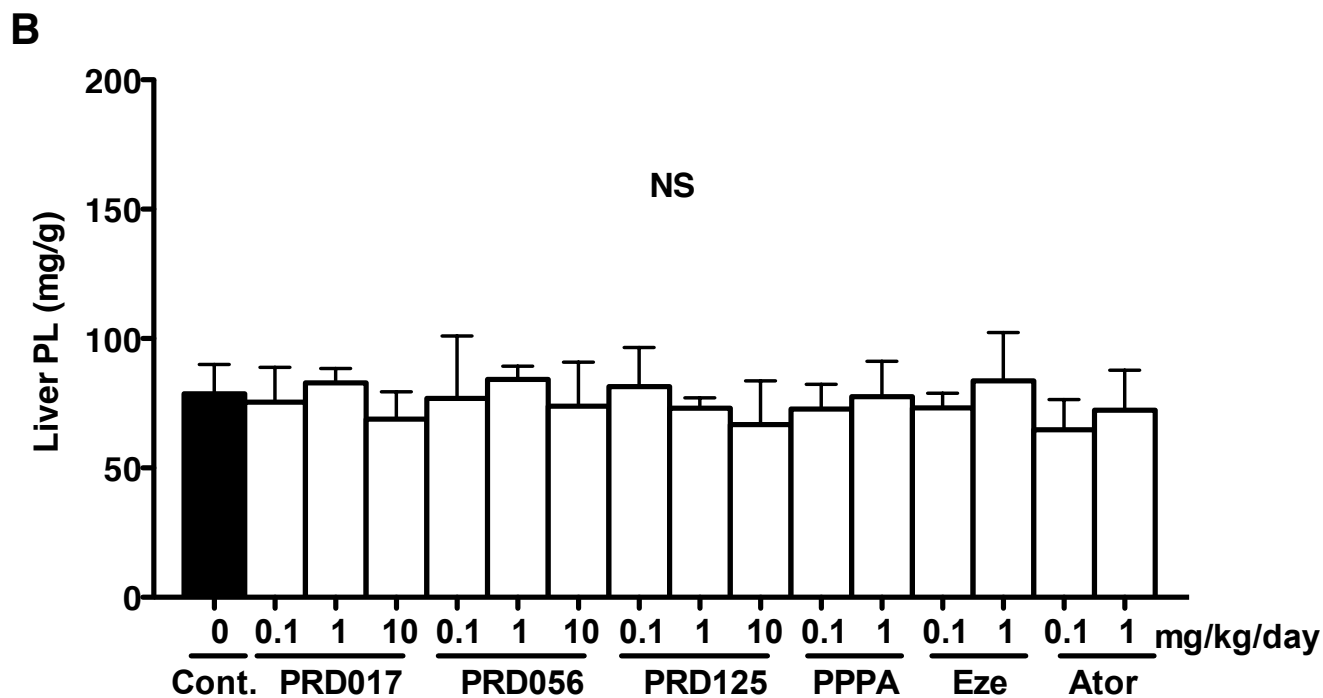

**Supplemental Figure 4 Triglyceride and phospholipid in the livers of 12-week drug-treated *Apoe*<sup>-/-</sup> mice.**

After 12-week treatment, the hepatic triglyceride (A) and phospholipid (B) of *Apoe*<sup>-/-</sup> mice were measured. All data are expressed as mean values  $\pm$  SD. NS indicates no significant difference (Kruskal-Wallis test followed by Dunn's post hoc test).

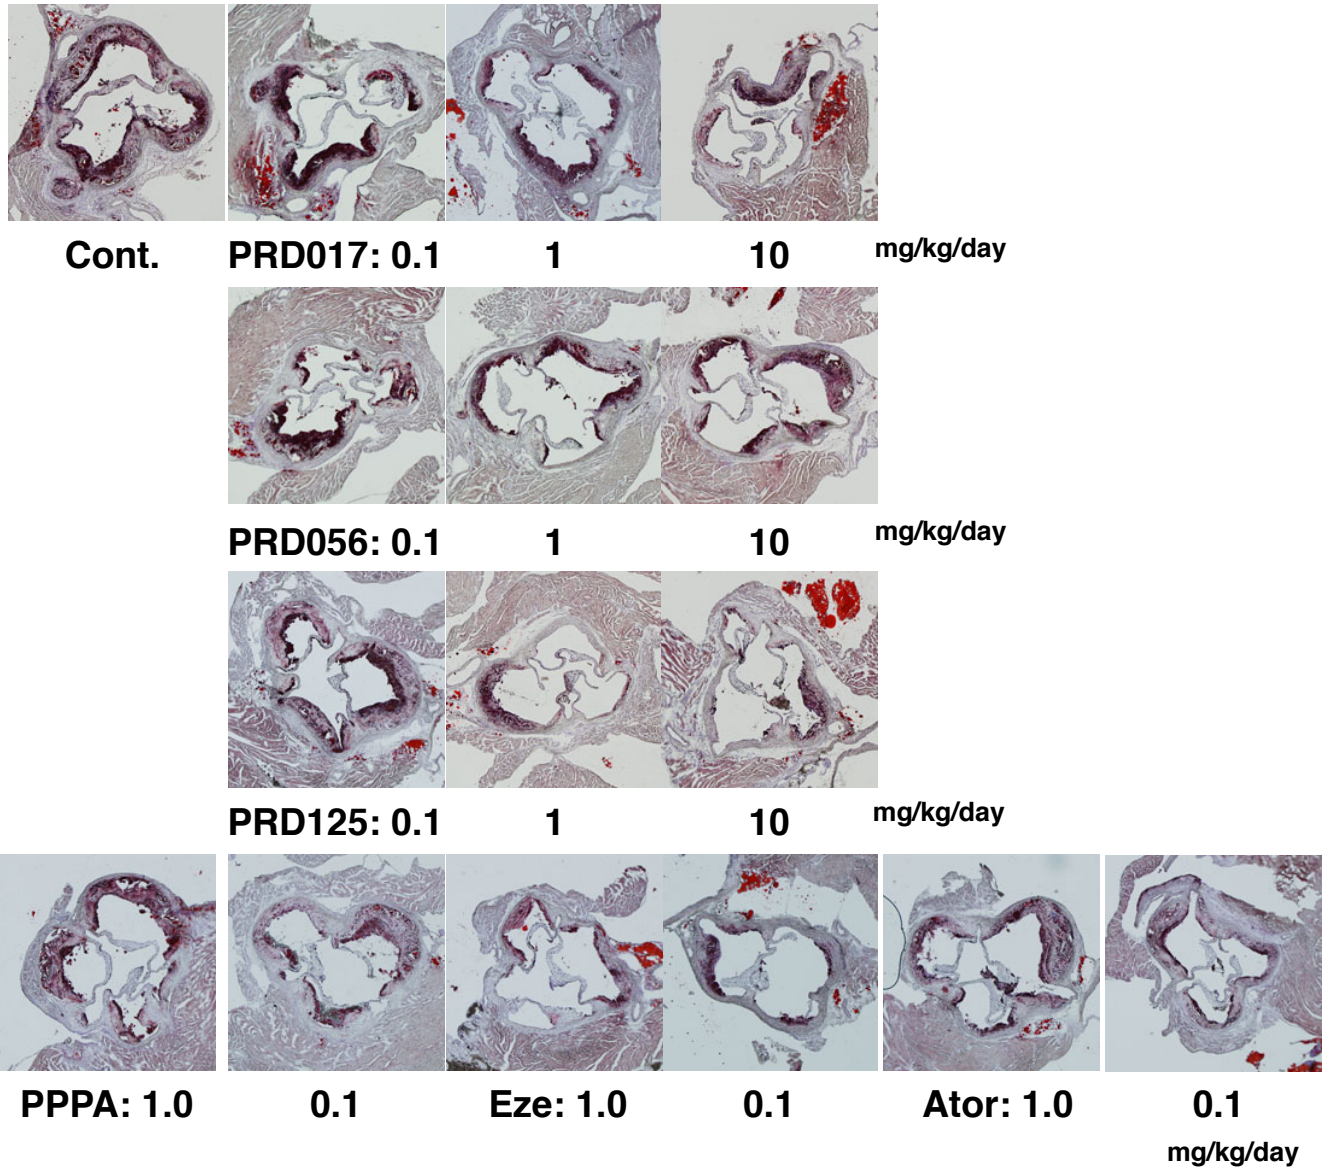

**Supplemental Figure 5 *In vivo* atheroprotective activity in hearts from 12-week drug-treated *Apoe*<sup>-/-</sup> mice.**

Representative photographs showing atherosclerotic lesions in the aortic sinus of hearts from 12-week drug-treated *Apoe*<sup>-/-</sup> mice. The cross sections of each heart were stained with Oil red O.

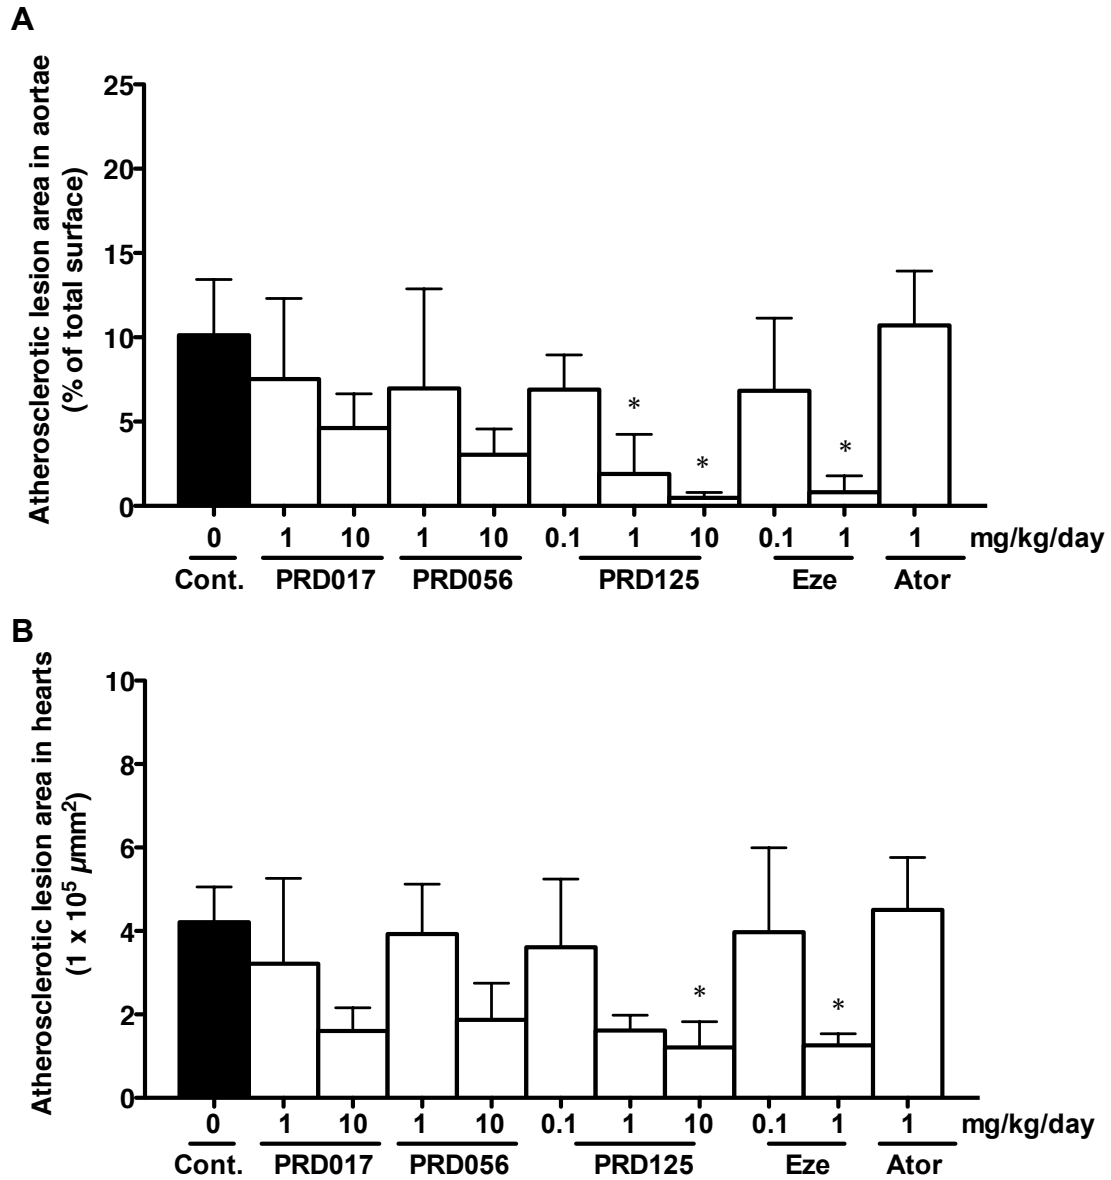

**Supplemental Figure 6 *In vivo* atheroprotective activity in aortae and hearts from 12-week drug-treated *Ldlr*<sup>-/-</sup> mice.**

After 12-week treatment, the atherosclerotic lesion area in the aortae (A) and aortic sinus of heart (B) were quantified. All data are expressed as mean values  $\pm$  SD. Statistically significant differences among groups are analyzed with Kruskal-Wallis test followed by Dunn's post hoc test. \* denotes  $p < 0.05$  compared with control (0 mg/kg/day).

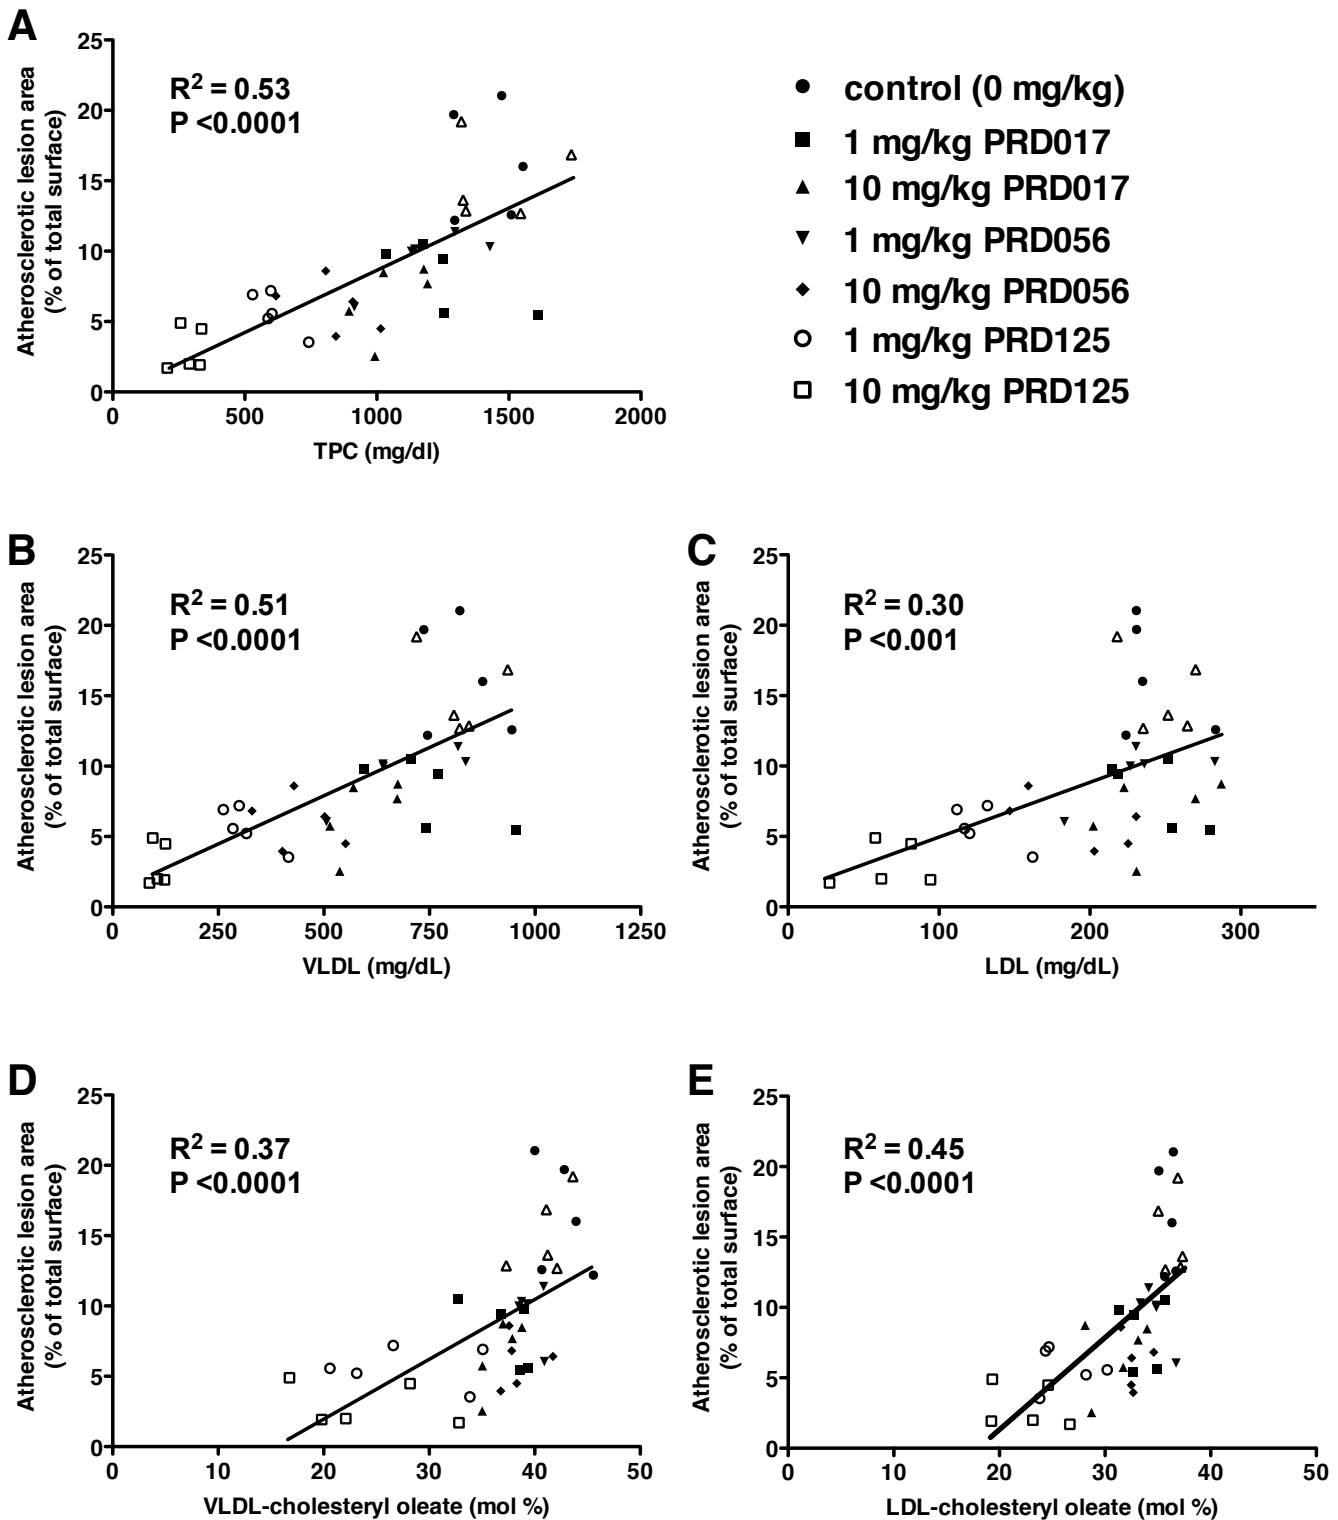

**Supplemental Figure 7 Relationship between atherosclerotic lesion area and plasma parameters in 12-week drug-treated *Apoe*<sup>-/-</sup> mice.**

Regression analysis was used to show the strength of the association among plasma parameters TPC (A), VLDL-C (B), LDL-C (C), VLDL-cholesteryl oleate (D) and LDL-cholesteryl oleate (E) and atherosclerotic lesion area using the least-squares best fit regression model.



Supplemental Table 1 Body weight in drug-treated *ApoE*<sup>-/-</sup> mice

| Compound                | Dosage (mg/<br>kg/day) | Body weight (g) |            |            |
|-------------------------|------------------------|-----------------|------------|------------|
|                         |                        | week 0          | week 6     | week 12    |
| Control (non-treatment) |                        | 22.0 ± 2.6      | 29.5 ± 1.8 | 34.6 ± 3.4 |
| PRD017                  | 0.1                    | 23.2 ± 2.4      | 30.1 ± 3.9 | 33.4 ± 5.6 |
|                         | 1                      | 21.7 ± 2.8      | 28.0 ± 4.0 | 31.1 ± 5.4 |
|                         | 10                     | 24.6 ± 1.5      | 28.5 ± 3.4 | 32.1 ± 5.5 |
| PRD056                  | 0.1                    | 24.1 ± 2.3      | 31.0 ± 3.8 | 33.0 ± 4.5 |
|                         | 1                      | 23.4 ± 1.8      | 29.0 ± 2.1 | 31.9 ± 3.2 |
|                         | 10                     | 21.8 ± 3.3      | 25.6 ± 3.0 | 27.8 ± 5.3 |
| PRD125                  | 0.1                    | 22.0 ± 1.6      | 27.5 ± 2.1 | 30.9 ± 3.7 |
|                         | 1                      | 20.9 ± 2.9      | 29.0 ± 3.4 | 33.4 ± 5.5 |
|                         | 10                     | 23.1 ± 1.3      | 28.1 ± 2.7 | 31.7 ± 3.6 |
| PPPA                    | 0.1                    | 23.0 ± 3.4      | 28.4 ± 4.5 | 32.2 ± 5.4 |
|                         | 1                      | 23.2 ± 2.7      | 27.2 ± 2.4 | 30.6 ± 3.4 |
| Ezetimibe               | 0.1                    | 21.0 ± 3.5      | 26.1 ± 4.3 | 28.0 ± 6.3 |
|                         | 1                      | 22.7 ± 2.4      | 28.9 ± 3.6 | 31.8 ± 4.2 |
| Atorvastatin            | 0.1                    | 21.8 ± 1.5      | 29.3 ± 2.4 | 33.8 ± 3.6 |
|                         | 1                      | 22.7 ± 2.6      | 28.4 ± 3.0 | 32.0 ± 4.6 |

All data are expressed as mean values ± SD. All data within each treatment period (week 0, week 6 or week 12) show no significant difference with  $p > 0.05$  (Kruskal-Wallis test followed by Dunn's post hoc test).

Supplemental Table 2 ALT in drug-treated *Apoe*<sup>-/-</sup> mice

| Compound                | Dosage (mg/<br>kg/day) | ALT (IU/L)  |             |
|-------------------------|------------------------|-------------|-------------|
|                         |                        | week 0      | week 12     |
| Control (non-treatment) |                        | 24.9 ± 5.9  | 54.8 ± 13.3 |
| PRD017                  | 0.1                    | 26.1 ± 6.6  | 56.6 ± 15.6 |
|                         | 1                      | 24.7 ± 6.9  | 42.5 ± 14.4 |
|                         | 10                     | 21.3 ± 4.4  | 45.8 ± 28.8 |
| PRD056                  | 0.1                    | 28.1 ± 21.1 | 47.8 ± 18.5 |
|                         | 1                      | 21.6 ± 5.7  | 50.9 ± 16.5 |
|                         | 10                     | 21.5 ± 6.8  | 38.1 ± 9.4  |
| PRD125                  | 0.1                    | 19.8 ± 8.4  | 68.6 ± 57.6 |
|                         | 1                      | 23.6 ± 6.4  | 51.5 ± 24.0 |
|                         | 10                     | 25.3 ± 10.4 | 31.6 ± 6.8  |
| PPPA                    | 0.1                    | 31.9 ± 8.6  | 53.4 ± 18.9 |
|                         | 1                      | 25.5 ± 13.7 | 75.1 ± 20.9 |
| Ezetimibe               | 0.1                    | 24.4 ± 15.4 | 45.4 ± 27.2 |
|                         | 1                      | 23.2 ± 7.3  | 39.4 ± 19.4 |
| Atorvastatin            | 0.1                    | 30.4 ± 12.6 | 43.8 ± 7.5  |
|                         | 1                      | 32.0 ± 11.2 | 45.4 ± 15.8 |

All data are expressed as mean values ± SD. All data within each treatment period (week 0 or week 12) show no significant difference with  $p > 0.05$  (Kruskal-Wallis test followed by Dunn's post hoc test).

Supplemental Table 3 BUN in drug-treated *ApoE*<sup>-/-</sup> mice

| Compound                | Dosage (mg/<br>kg/day) | BUN (mg/dL) |            |
|-------------------------|------------------------|-------------|------------|
|                         |                        | week 0      | week 12    |
| Control (non-treatment) |                        | 28.2 ± 5.4  | 24.4 ± 4.0 |
| PRD017                  | 0.1                    | 26.7 ± 6.0  | 25.8 ± 5.1 |
|                         | 1                      | 34.6 ± 4.4  | 27.1 ± 6.2 |
|                         | 10                     | 33.3 ± 3.9  | 24.9 ± 2.7 |
| PRD056                  | 0.1                    | 28.7 ± 7.5  | 24.0 ± 3.1 |
|                         | 1                      | 26.6 ± 7.5  | 24.3 ± 2.6 |
|                         | 10                     | 30.2 ± 6.4  | 22.3 ± 3.9 |
| PRD125                  | 0.1                    | 30.9 ± 5.3  | 25.7 ± 5.7 |
|                         | 1                      | 29.1 ± 4.7  | 22.3 ± 3.6 |
|                         | 10                     | 31.8 ± 5.6  | 20.5 ± 2.9 |
| PPPA                    | 0.1                    | 32.9 ± 8.3  | 19.1 ± 2.9 |
|                         | 1                      | 31.6 ± 8.8  | 30.6 ± 3.4 |
| Ezetimibe               | 0.1                    | 32.6 ± 8.3  | 23.0 ± 3.3 |
|                         | 1                      | 32.1 ± 5.0  | 22.5 ± 4.0 |
| Atorvastatin            | 0.1                    | 35.8 ± 6.9  | 28.0 ± 4.4 |
|                         | 1                      | 31.8 ± 5.8  | 25.2 ± 4.0 |

All data are expressed as mean values ± SD. All data within each treatment period (week 0 or week 12) show no significant difference with  $p > 0.05$  (Kruskal-Wallis test followed by Dunn's post hoc test).

Supplemental Table 4 Blood glucose in drug-treated *ApoE*<sup>-/-</sup> mice

| Compound                | Dosage (mg/<br>kg/day) | Blood glucose (mg/dL) |             |             |
|-------------------------|------------------------|-----------------------|-------------|-------------|
|                         |                        | week 0                | week 6      | week 12     |
| Control (non-treatment) |                        | 55.8 ± 3.9            | 61.7 ± 10.2 | 79.0 ± 8.0  |
| PRD017                  | 0.1                    | 55.2 ± 3.5            | 61.3 ± 13.9 | 84.5 ± 30.4 |
|                         | 1                      | 52.8 ± 4.2            | 54.0 ± 11.8 | 69.3 ± 11.5 |
|                         | 10                     | 53.4 ± 4.6            | 59.9 ± 6.1  | 81.7 ± 11.3 |
| PRD056                  | 0.1                    | 60.1 ± 3.6            | 55.9 ± 6.3  | 72.9 ± 20.7 |
|                         | 1                      | 58.8 ± 3.2            | 53.6 ± 6.1  | 74.6 ± 20.9 |
|                         | 10                     | 52.6 ± 6.5            | 60.7 ± 7.8  | 74.8 ± 16.1 |
| PRD125                  | 0.1                    | 56.8 ± 7.1            | 62.1 ± 9.0  | 69.0 ± 12.5 |
|                         | 1                      | 49.6 ± 3.1            | 57.4 ± 6.2  | 71.6 ± 13.0 |
|                         | 10                     | 53.0 ± 4.3            | 56.1 ± 5.0  | 68.8 ± 9.7  |
| PPPA                    | 0.1                    | 46.1 ± 4.1            | 49.8 ± 8.9  | 75.8 ± 13.0 |
|                         | 1                      | 57.0 ± 4.8            | 64.0 ± 16.9 | 85.0 ± 17.5 |
| Ezetimibe               | 0.1                    | 45.7 ± 3.0            | 65.5 ± 17.0 | 62.3 ± 21.6 |
|                         | 1                      | 54.9 ± 2.5            | 64.3 ± 7.6  | 64.1 ± 16.9 |
| Atorvastatin            | 0.1                    | 47.6 ± 2.7            | 61.2 ± 7.1  | 86.2 ± 10.8 |
|                         | 1                      | 51.7 ± 2.2            | 65.6 ± 6.7  | 81.4 ± 25.7 |

All data are expressed as mean values ± SD. All data within each treatment period (week 0, week 6 or week 12) show no significant difference with  $p > 0.05$  (Kruskal-Wallis test followed by Dunn's post hoc test).

Supplemental Table 5 Food intake in drug-treated *ApoE*<sup>-/-</sup> mice

| Compound                                    | Dosage (mg/<br>kg/day) | Food intake (g/day) |           |           |
|---------------------------------------------|------------------------|---------------------|-----------|-----------|
|                                             |                        | week 0              | week 6    | week 12   |
| Control (non-treatment)                     |                        | 2.5 ± 0.8           | 3.7 ± 1.2 | 3.3 ± 0.2 |
| PRD017                                      | 0.1                    | 3.0 ± 1.3           | 4.3 ± 0.5 | 3.3 ± 0.9 |
|                                             | 1                      | 2.5 ± 1.0           | 4.0 ± 0.6 | 3.8 ± 0.3 |
|                                             | 10                     | 2.7 ± 1.4           | 4.3 ± 0.4 | 4.0 ± 0.4 |
| PRD056                                      | 0.1                    | 2.6 ± 1.1           | 4.5 ± 0.3 | 3.9 ± 0.6 |
|                                             | 1                      | 2.6 ± 0.4           | 4.5 ± 0.2 | 3.6 ± 0.6 |
|                                             | 10                     | 2.8 ± 0.7           | 3.8 ± 0.3 | 3.7 ± 0.3 |
| PRD125                                      | 0.1                    | 2.5 ± 0.8           | 4.3 ± 0.2 | 4.0 ± 0.6 |
|                                             | 1                      | 2.7 ± 1.3           | 4.7 ± 0.5 | 3.5 ± 0.4 |
|                                             | 10                     | 2.9 ± 1.3           | 4.2 ± 0.3 | 3.8 ± 0.5 |
| PPPA                                        | 0.1                    | 3.7 ± 1.4           | 5.0 ± 0.3 | 3.4 ± 0.6 |
|                                             | 1                      | 2.8 ± 0.9           | 4.0 ± 0.7 | 3.5 ± 0.6 |
| <hr style="border-top: 1px dashed black;"/> |                        |                     |           |           |
| Ezetimibe                                   | 0.1                    | 2.7 ± 1.0           | 4.3 ± 0.4 | 2.8 ± 0.4 |
|                                             | 1                      | 2.6 ± 1.1           | 4.2 ± 0.1 | 3.2 ± 0.8 |
| Atorvastatin                                | 0.1                    | 2.4 ± 0.9           | 4.0 ± 0.2 | 3.9 ± 0.5 |
|                                             | 1                      | 2.5 ± 1.1           | 4.2 ± 0.5 | 3.8 ± 0.7 |

All data are expressed as mean values ± SD. All data within each treatment period (week 0, week 6 or week 12) show no significant difference with  $p > 0.05$  (Kruskal-Wallis test followed by Dunn's post hoc test).

Supplemental Table 6 TPC concentrations in drug-treated *ApoE*<sup>-/-</sup> mice

| Compound                | Dosage (mg/<br>kg/day) | TPC (mg/dL) |                         |                          |
|-------------------------|------------------------|-------------|-------------------------|--------------------------|
|                         |                        | week 0      | week 6                  | week 12                  |
| Control (non-treatment) |                        | 559 ± 177   | 1256 ± 231              | 1439 ± 151               |
| PRD017                  | 0.1                    | 569 ± 157   | 1224 ± 493              | 1302 ± 209               |
|                         | 1                      | 565 ± 58    | 965 ± 423               | 1223 ± 236               |
|                         | 10                     | 567 ± 115   | 903 ± 187               | 1031 ± 115               |
| PRD056                  | 0.1                    | 548 ± 107   | 1007 ± 312              | 1312 ± 440               |
|                         | 1                      | 555 ± 79    | 1041 ± 376              | 1212 ± 380               |
|                         | 10                     | 564 ± 122   | 850 ± 324               | 839 ± 146* <sup>#</sup>  |
| PRD125                  | 0.1                    | 558 ± 169   | 1037 ± 312              | 1155 ± 247               |
|                         | 1                      | 562 ± 173   | 603 ± 116 <sup>#</sup>  | 606 ± 134* <sup>#</sup>  |
|                         | 10                     | 575 ± 115   | 433 ± 108* <sup>#</sup> | 295 ± 52* <sup>#</sup>   |
| PPPA                    | 0.1                    | 552 ± 85    | 1041 ± 286              | 1353 ± 236               |
|                         | 1                      | 531 ± 200   | 1281 ± 296              | 1507 ± 199               |
| Ezetimibe               | 0.1                    | 561 ± 135   | 970 ± 259               | 967 ± 257                |
|                         | 1                      | 558 ± 148   | 507 ± 202 <sup>#</sup>  | 732 ± 187* <sup>#</sup>  |
| Atorvastatin            | 0.1                    | 569 ± 102   | 1394 ± 123              | 1420 ± 141               |
|                         | 1                      | 568 ± 111   | 1268 ± 426              | 1254 ± 285 <sup>ab</sup> |

All data are expressed as mean values ± SD. Statistically significant differences among groups are analyzed with Kruskal-Wallis test followed by Dunn's post hoc test. \* and # denotes  $p < 0.05$  compared with control (0 mg/kg/day) and PPPA (1 mg/kg/day), respectively.

Supplemental Table 7 Triglyceride in plasma of drug-treated *ApoE*<sup>-/-</sup> mice

| Compound                | Dosage (mg/<br>kg/day) | Triglyceride (mg/dL) |           |          |
|-------------------------|------------------------|----------------------|-----------|----------|
|                         |                        | week 0               | week 6    | week 12  |
| Control (non-treatment) |                        | 135 ± 47             | 126 ± 37  | 127 ± 26 |
| PRD017                  | 0.1                    | 141 ± 62             | 104 ± 39  | 99 ± 25  |
|                         | 1                      | 146 ± 63             | 85 ± 42   | 102 ± 32 |
|                         | 10                     | 193 ± 24             | 147 ± 16  | 137 ± 34 |
| PRD056                  | 0.1                    | 171 ± 93             | 103 ± 46  | 98 ± 34  |
|                         | 1                      | 145 ± 89             | 114 ± 45  | 105 ± 44 |
|                         | 10                     | 164 ± 65             | 170 ± 38  | 159 ± 46 |
| PRD125                  | 0.1                    | 182 ± 133            | 135 ± 51  | 113 ± 44 |
|                         | 1                      | 127 ± 49             | 178 ± 102 | 115 ± 72 |
|                         | 10                     | 163 ± 54             | 180 ± 82  | 172 ± 42 |
| PPPA                    | 0.1                    | 162 ± 59             | 98 ± 34   | 110 ± 21 |
|                         | 1                      | 130 ± 41             | 112 ± 35  | 134 ± 40 |
| Ezetimibe               | 0.1                    | 142 ± 50             | 86 ± 34   | 81 ± 30  |
|                         | 1                      | 151 ± 62             | 150 ± 80  | 112 ± 51 |
| Atorvastatin            | 0.1                    | 159 ± 46             | 93 ± 28   | 110 ± 42 |
|                         | 1                      | 150 ± 53             | 103 ± 18  | 132 ± 53 |

All data are expressed as mean values ± SD. All data within each treatment period (week 0, week 6 or week 12) show no significant difference with  $p > 0.05$  (Kruskal-Wallis test followed by Dunn's post hoc test).

Supplemental Table 8 TPC concentrations in drug-treated *Ldlr*<sup>-/-</sup> mice

| Compound                | Dosage (mg/<br>kg/day) | TPC (mg/dL) |            |            |
|-------------------------|------------------------|-------------|------------|------------|
|                         |                        | week 0      | week 6     | week 12    |
| Control (non-treatment) |                        | 267 ± 89    | 1038 ± 263 | 1200 ± 174 |
| PRD017                  | 1                      | 245 ± 53    | 809 ± 284  | 953 ± 299  |
|                         | 10                     | 237 ± 22    | 634 ± 227  | 726 ± 174* |
| PRD056                  | 1                      | 293 ± 82    | 755 ± 347  | 941 ± 198  |
|                         | 10                     | 266 ± 72    | 591 ± 197  | 680 ± 245  |
| PRD125                  | 0.1                    | 279 ± 49    | 872 ± 165  | 816 ± 237  |
|                         | 1                      | 272 ± 92    | 571 ± 149  | 564 ± 98*  |
|                         | 10                     | 298 ± 94    | 536 ± 201* | 348 ± 77*  |
| -----                   |                        |             |            |            |
| ezetimibe               | 0.1                    | 279 ± 26    | 780 ± 250  | 1053 ± 351 |
|                         | 1                      | 277 ± 71    | 564 ± 86   | 571 ± 78   |
| atorvastatin            | 1                      | 322 ± 47    | 921 ± 197  | 1266 ± 258 |

All data are expressed as mean values ± SD. Statistically significant differences among groups are analyzed with Kruskal-Wallis test followed by Dunn's post hoc test. \* denotes  $p < 0.05$  compared with control (0 mg/kg/day).



Supplemental Table 9 Cholesterol concentrations in lipoprotein from 12-week drug-treated *Ldlr*<sup>-/-</sup> mice

| Compound                | Dosage (mg/kg/day) | Cholesterol (mg/dL) |           |           |          |
|-------------------------|--------------------|---------------------|-----------|-----------|----------|
|                         |                    | Chiomicron          | VLDL      | LDL       | HDL      |
| Control (non-treatment) |                    | 86 ± 54             | 631 ± 126 | 388 ± 40  | 94 ± 15  |
| PRD017                  | 1                  | 72 ± 59             | 507 ± 101 | 393 ± 74  | 85 ± 21  |
|                         | 10                 | 30 ± 11             | 356 ± 79  | 423 ± 61  | 101 ± 10 |
| PRD056                  | 1                  | 65 ± 42             | 428 ± 102 | 366 ± 100 | 82 ± 30  |
|                         | 10                 | 35 ± 19             | 231 ± 100 | 318 ± 116 | 96 ± 40  |
| PRD125                  | 0.1                | 59 ± 20             | 369 ± 125 | 293 ± 88  | 96 ± 32  |
|                         | 1                  | 25 ± 7              | 190 ± 56  | 248 ± 47  | 100 ± 11 |
|                         | 10                 | 17 ± 21*            | 93 ± 27*  | 159 ± 48* | 79 ± 30  |
| -----                   |                    |                     |           |           |          |
| ezetimibe               | 0.1                | 66 ± 53             | 522 ± 274 | 356 ± 80  | 109 ± 23 |
|                         | 1                  | 44 ± 49             | 227 ± 79  | 223 ± 92  | 77 ± 41  |
| atorvastatin            | 1                  | 81 ± 36             | 639 ± 158 | 441 ± 119 | 106 ± 26 |

All data are expressed as mean values ± SD. Statistically significant differences among groups are analyzed with Kruskal-Wallis test followed by Dunn's post hoc test. \* denotes  $p < 0.05$  compared with control (0 mg/kg/day).
